# Supplementary material for: Recombinant MVA-prime elicits neutralizing antibody responses by inducing antigen-specific B cells in the germinal center
Source: PubMed Central journal article supplement (PMC7835239; doi:10.1038/s41541-020-00277-1), 2021-01-25

**Supplementary Table 1. Prime and boost immunization schedule**

| <b>Group<br/>(n=6 per group)</b> | <b>Prime (Week)</b> | <b>Protein boost<br/>(Week)</b> | <b>Sample collection</b> |
|----------------------------------|---------------------|---------------------------------|--------------------------|
| Plasmid DNA                      | 0, 4, 8             | 30                              | 0, 10, 32                |
| rMVA                             | 0, 8                | 30                              | 0, 10, 32                |
| rVSV                             | 0                   | 30                              | 0, 2, 32                 |
| Control                          | no prime            | 0, 10                           | 0, 2, 12                 |

Monkeys received intra-muscular immunization with vectors expressing Env C.1086. Primed monkeys received an MF59-adjuvanted rEnv C.1086 protein at week 30. Monkeys in Control group received two immunizations with rEnv C.1086 in combination with MF59 at weeks 0 and 10.

**Supplementary Table 2. Analysis of fluidigm data with respect to vaccine group**

| <b>rMVA vs. other vaccine groups</b> | <b>rMVA vs. rVSV</b> | <b>rMVA vs. DNA</b> |
|--------------------------------------|----------------------|---------------------|
| IL4                                  | TNFRSF11A RANK       | CD4+84              |
| CD4+27                               | ICOS                 | CSF1 MCSF           |
| PTPN6 SHP1                           | PTPN6 SHP1           | CD4+27              |
| CD4+4                                | STAT1                | CCR7                |
| TBX21 TBET                           | IL6ST GP130          | PTPN6 SHP1          |
| BCL6                                 | CD4+109              | TNFSF10 TRAIL       |
| IL13                                 | IL4                  | RUNX1               |
| CD4+84                               | BTLA                 | SMAD4               |
| IL17                                 | CD4+4                | PRDM1 Blimp1        |
| IL6ST GP130                          | LTB TNFc             | FLIP                |
| BAX                                  | CD4+40LG             | NKRF ITBA4          |
| POU2AF1                              | RORA                 | GZMB                |
| TGFBR3 BGCAN                         | IL13                 | TGFB1               |
| CCL3                                 | IL2RB                | NFATC1              |
| RUNX1                                | PDCD4+1              | POU2AF1             |
| CD4+69                               | LIF                  | IL10                |
| IL10                                 | TGFBR3 BGCAN         | IL4                 |
| LTB TNFc                             | POU2AF1              | MAF                 |
| MYC                                  | NKRF ITBA4           | IL2Rg CD4+132       |
| CCR7                                 | GZMA CTLA3           | CD4+4               |

**Supplementary Table 3. TaqMan Primers and Probes**

| Primer ID     | Gene Symbol   | Species |
|---------------|---------------|---------|
| Hs00180269_m1 | BAX           | Human   |
| Hs00277037_m1 | BCL6          | Human   |
| Hs00154109_m1 | BIRC3, CIAP2  | Human   |
| Hs00153353_m1 | BIRC5         | Human   |
| Rh02889477_m1 | BTLA          | Rhesus  |
| Rh02788104_gH | CCL3          | Rhesus  |
| Rh02788105_m1 | CCL5          | Rhesus  |
| Hs00266213_s1 | CCR3          | Human   |
| Rh02788181_s1 | CCR6          | Rhesus  |
| Hs99999080_m1 | CCR7          | Human   |
| Hs00370347_m1 | CD109         | Human   |
| Rh02837950_m1 | CD27          | Rhesus  |
| Hs00174796_m1 | CD28          | Human   |
| Hs00181217_m1 | CD4           | Human   |
| Rh02787995_m1 | CD40LG        | Rhesus  |
| Hs00934033_m1 | CD69          | Human   |
| Hs01547121_m1 | CD84          | Human   |
| Hs01567025_m1 | CD86          | Human   |
| Hs00233520_m1 | CD8a          | Human   |
| Hs00192860_m1 | CLEC2B, AI1C  | Human   |
| Hs00174164_m1 | CSF1, MCSF    | Human   |
| Rh02787987_m1 | CTLA4         | Rhesus  |
| Hs00757930_m1 | CXCL13, BLC   | Human   |
| Hs01847760_s1 | CXCR3, MIGR   | Human   |
| Hs00540548_s1 | CXCR5         | Human   |
| Hs00175210_m1 | DPP4, CD26    | Human   |
| Hs00172872_m1 | EOMES, TBR2   | Human   |
| Hs00531110_m1 | FAS           | Human   |
| Hs00181225_m1 | FASLG, CD95LG | Human   |
| Hs01116280_m1 | FLIP          | Human   |
| Hs00212860_m1 | FOXP1         | Human   |
| Hs00203958_m1 | FOXP3         | Human   |
| Hs01022023_m1 | GABPA         | Human   |
| Rh02621745_g1 | GAPDH         | Rhesus  |
| Hs00231122_m1 | GATA3         | Human   |
| Hs00989184_m1 | GZMA, CTLA3   | Human   |
| Hs01554355_m1 | GZMB          | Human   |
| Hs00219575_m1 | HLADRA        | Human   |

| Primer ID     | Gene Symbol   | Species |
|---------------|---------------|---------|
| Rh02621771_m1 | ICOS          | Rhesus  |
| Rh02788577_m1 | IFNG          | Rhesus  |
| Rh02789325_m1 | IL10          | Rhesus  |
| Hs01548202_m1 | IL12RbII      | Human   |
| Rh03043053_m1 | IL13          | Rhesus  |
| Hs00189606_m1 | IL16          | Human   |
| Hs00174383_m1 | IL17 $\alpha$ | Human   |
| Rh02789780_m1 | IL2           | Rhesus  |
| Hs00222327_m1 | IL21          | Human   |
| Hs00222310_m1 | IL21R         | Human   |
| Hs00907777_m1 | IL2RA         | Human   |
| Hs01081697_m1 | IL2RB         | Human   |
| Hs00415671_m1 | IL2Rg, CD132  | Human   |
| Rh02789319_m1 | IL4           | Rhesus  |
| Hs00169842_m1 | IL6R, CD126   | Human   |
| Hs00174360_m1 | IL6ST, GP130  | Human   |
| Rh02841231_m1 | IL7R          | Rhesus  |
| Rh02850395_m1 | IRF4          | Rhesus  |
| Rh02841703_m1 | LAG3          | Rhesus  |
| Hs01547250_m1 | LEF1          | Human   |
| Hs00236874_m1 | LTA, TNFb     | Human   |
| Hs00242739_m1 | LTB, TNFc     | Human   |
| Hs00193519_m1 | MAF           | Human   |
| Hs01032443_m1 | MKI67, KI67   | Human   |
| Hs00383033_m1 | MTA3          | Human   |
| Rh02913645_m1 | MYC           | Rhesus  |
| Hs00542678_m1 | NFATC1        | Human   |
| Hs00213907_m1 | NKRF, ITBA4   | Human   |
| Rh03418231_m1 | PDCCD1        | Rhesus  |
| Hs01573371_m1 | POU2AF1       | Human   |
| Hs00153357_m1 | PRDM1, Blimp1 | Human   |
| Hs00169359_m1 | PTPN6, SHP1   | Human   |
| Rh00931151_m1 | RORA          | Rhesus  |
| Rh02892670_m1 | RORC          | Rhesus  |
| Hs00231079_m1 | RUNX1         | Human   |
| Rh02929319_m1 | RUNX3         | Rhesus  |
| Hs00158978_m1 | SH2D1A, LYP   | Human   |
| Hs00232068_m1 | SMAD4         | Human   |

| Primer ID     | Gene Symbol     | Species |
|---------------|-----------------|---------|
| Hs00705164_s1 | SOCS1           | Human   |
| Rh02899274_m1 | STAT1           | Rhesus  |
| Hs00598625_m1 | STAT6           | Human   |
| Hs00894392_m1 | TBX21, TBET     | Human   |
| Hs00998133_m1 | TGFB1           | Human   |
| Hs00610318_m1 | TGFBR1          | Human   |
| Hs01114253_m1 | TGFBR3, BGCAN   | Human   |
| Hs99999139_m1 | TIMP1           | Human   |
| Hs00174128_m1 | TNF, TNFa       | Human   |
| Hs00187192_m1 | TNFRSF11A, RANK | Human   |
| Hs00533968_m1 | TNFRSF4, OX40   | Human   |
| Hs00155512_m1 | TNFRSF9, CD137  | Human   |
| Hs00921974_m1 | TNFSF10, TRAIL  | Human   |
| Hs00198106_m1 | TNFSF13B, BAFF  | Human   |
| Hs00184192_m1 | TRAF2           | Human   |
| Hs00179626_m1 | TRAT1, TRIM     | Human   |
| Hs99999081_m1 | IL3             | Human   |
| Hs00929873_m1 | CSF2            | Human   |
| Hs00234149_m1 | SLAMF1, CD150   | Human   |
| Hs00171455_m1 | LIF             | Human   |

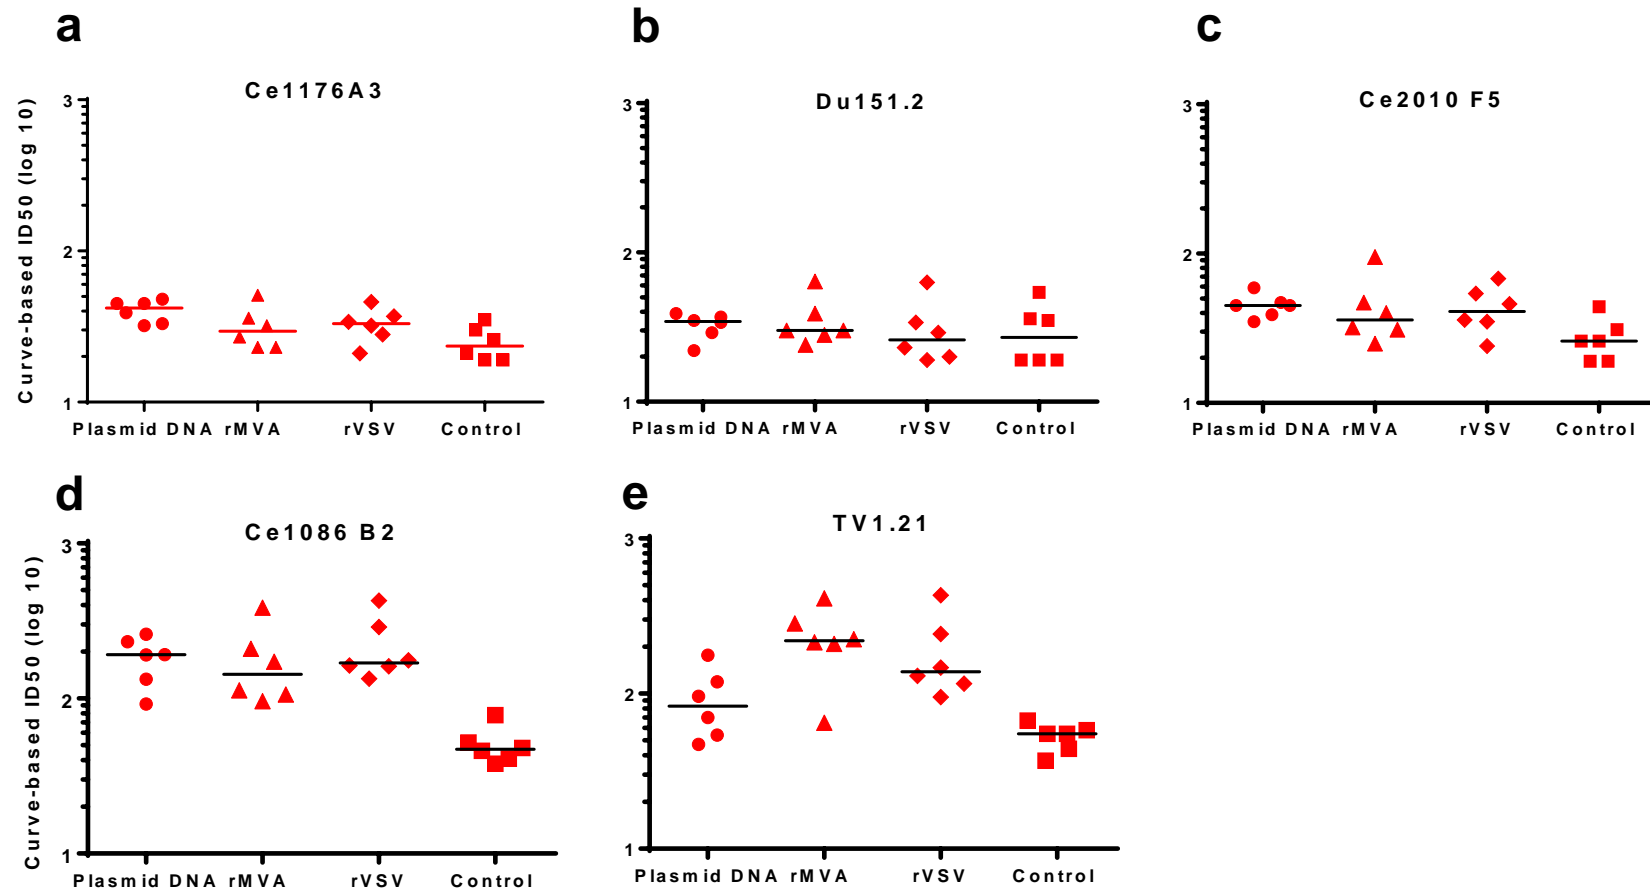

**Supplementary Figure 1.** Neutralizing antibody responses as measured by A3R5 cell-based assay. A3R5 cell-based neutralization assays were performed against replication-competent IMC.LucR tier 2 clade C viruses. Log ID50 values for pre-immunization (black symbols) and post-protein boost (red symbols) time points are shown for plasmid DNA (circles), rMVA (triangles) and rVSV (diamonds) groups. For protein only control group (squares) data from two weeks post second protein immunization at week 12 are shown. Panels a-e show ID50 titers against five different viruses, Ce1176 A3, Du151.2, Ce2010 F5, Ce.1086 and TV1.21. The line indicates the geometric mean of the six monkeys per group.

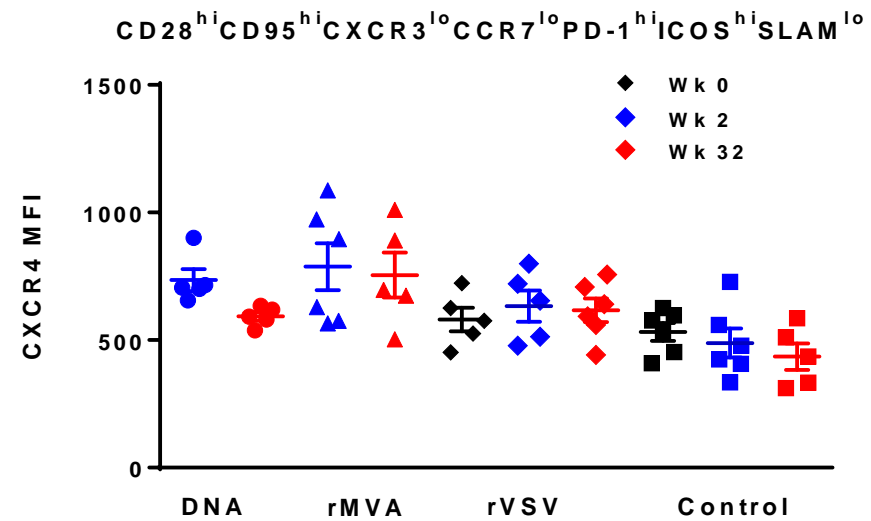

**Supplementary Figure 2.** CXCR4 level per cell as measured by Mean Fluorescence Intensity (MFI) are shown in lymph node-derived lymphocytes at indicated timepoints. Black symbols pre-priming; blue symbols post-priming and red symbols post-boost. Data from individual monkeys from four vaccine groups are shown. Bars depict mean  $\pm$  SEM

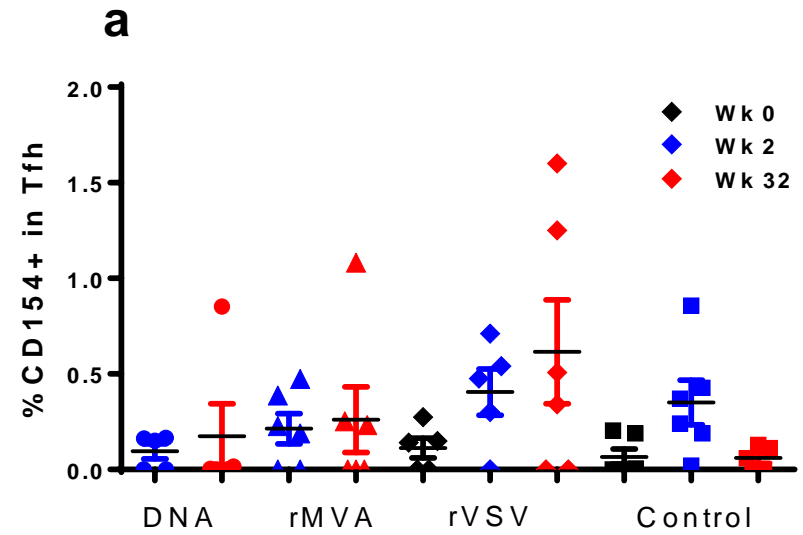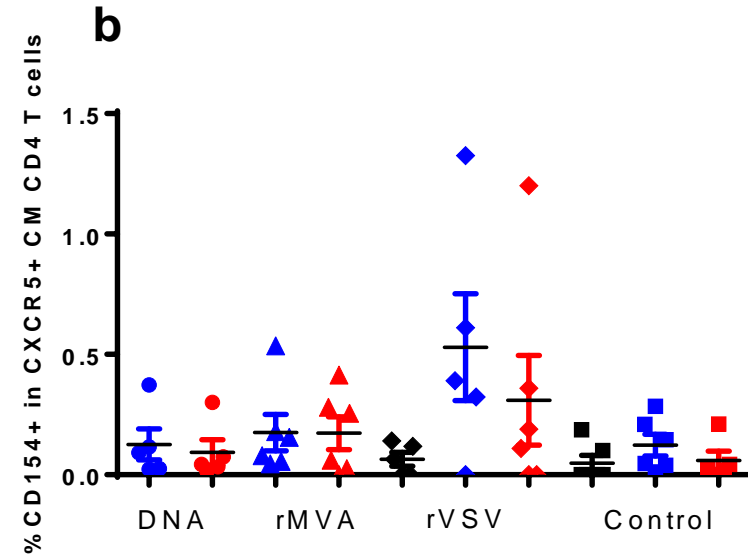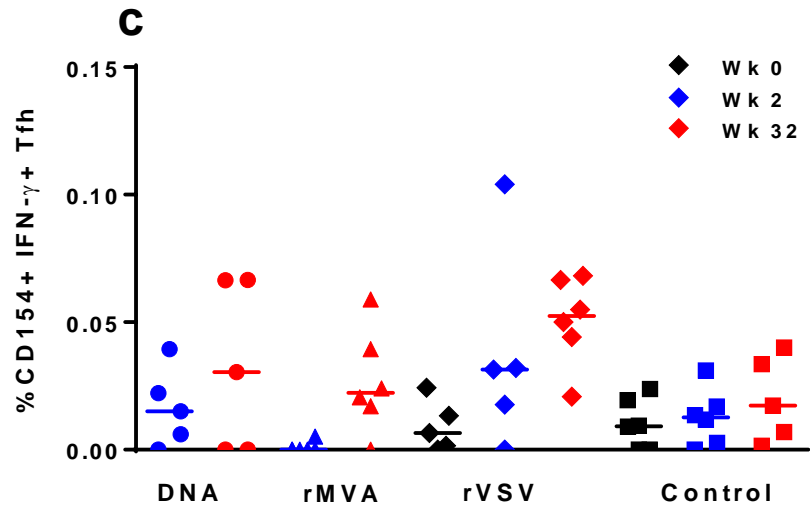

**Supplementary Figure 3.** a) LN-derived cells were incubated ex vivo in the absence or the presence of an Env peptide pool and the relative expression of CD154 was analyzed by an intracellular flow cytometry assay. The % of Tfh CD4+ T and b) in “central memory” CXCR5<sup>hi</sup> cells expressing a CD154+ phenotype is shown. c) The simultaneous expression of CD154 and production of IFN- $\gamma$  was analyzed by flow cytometry. The subtracted (after deduction of the background-no stimulation values) calculated frequencies of Tfh CD4+ T cells expressing a CD154+ IFN- $\gamma$ + phenotype is shown. Horizontal bars show median values. Bars depict SEM. Non-parametric Mann-Whitney U test was used for the statistical analysis.

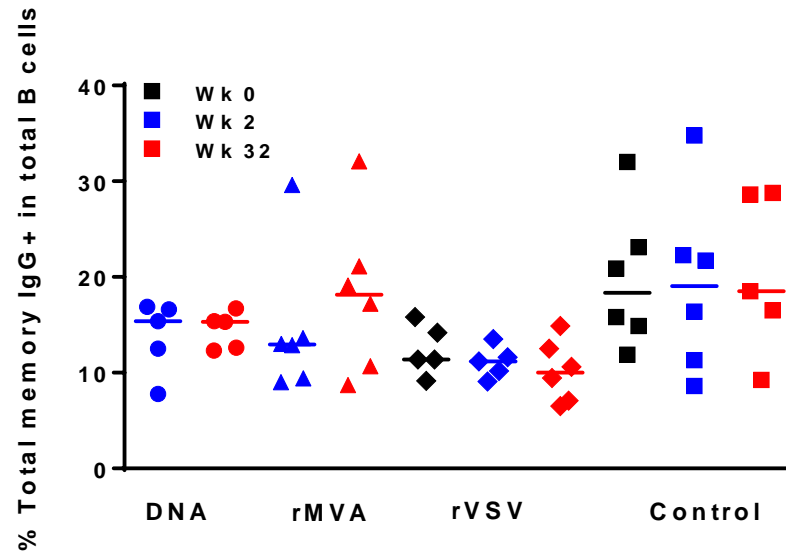

**Supplementary Figure 4.** Dot plot showing relative frequencies (%) of bulk B cells in LN tissues obtained at the indicated time points. Black symbols pre-priming; blue symbols post-priming and red symbols post-boost. The surface expression of IgG was analyzed by flow cytometry and the % of IgG+ bulk B cells from LN tissues is shown. The relative frequencies are shown as a percentage of total B cells. Horizontal bars show median values.

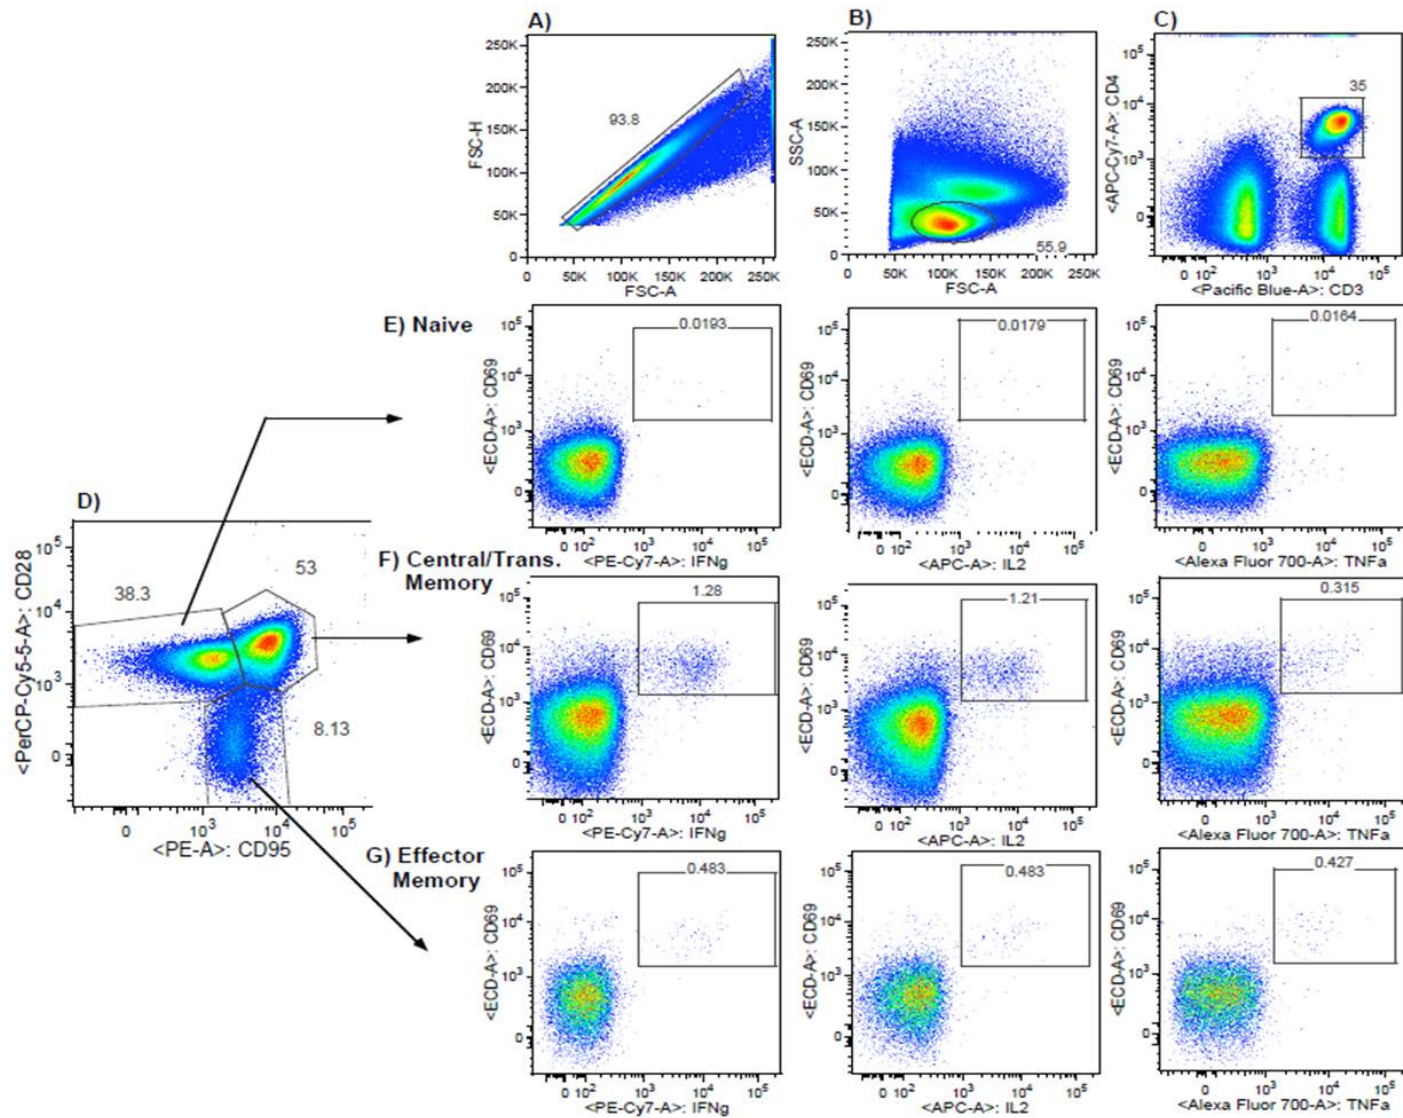

**Supplementary Figure 5a** Gating strategy for CD4<sup>+</sup> naive, effector memory and central/transitional memory T cells



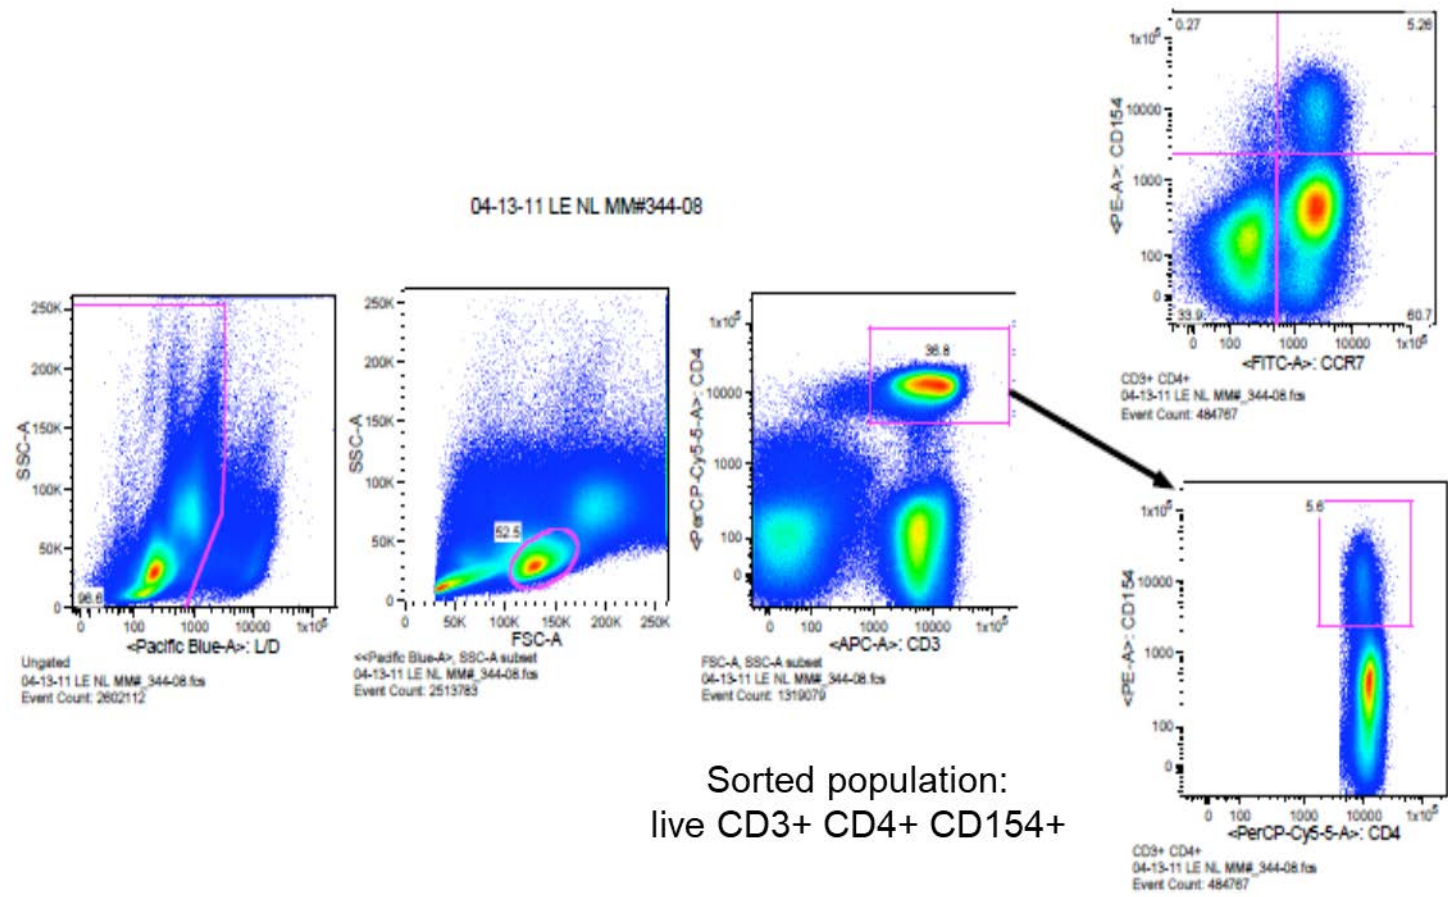

**Supplementary Figure 5b** Gating strategy for CD4+ CD154+T cell sort

**c**

**CD4 Tfh**

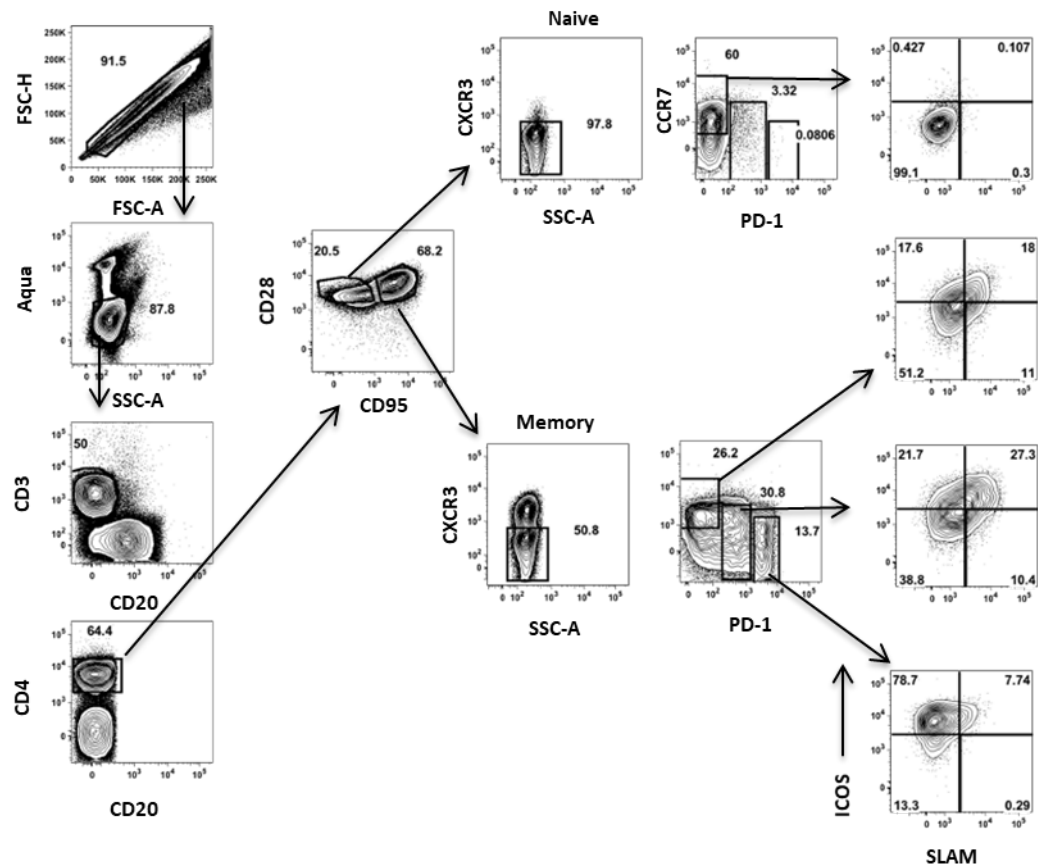

Supplementary Figure 5c-d Gating strategy for c) CD4<sup>+</sup> Tfh cells d) lymph node B cells

**d**

**LN B cells**

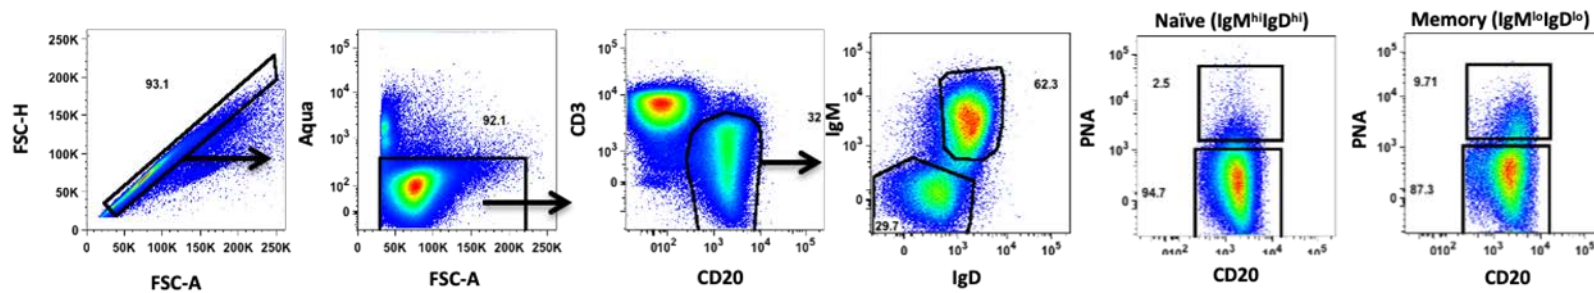

Supplement: 41541_2020_277_MOESM1_ESM.pdf [file 41541_2020_277_MOESM1_ESM.pdf]
